## *IL-1 and IL-6 response modules in COVID-19*

### 1 Title

2 Transcriptional response modules characterise IL-1 $\beta$  and IL-6 activity in COVID-19

3

### 4 Authors

5 Lucy CK Bell<sup>1,2</sup>, Cem Meydan<sup>3</sup>, Jacob Kim<sup>4,5</sup>, Jonathan Foox<sup>3,6</sup>, Daniel Butler<sup>3,6</sup>, Christopher E. Mason<sup>3,6,7,8</sup>, Sagi  
6 D. Shapira<sup>4,5</sup>, Mahdad Noursadeghi<sup>1,2</sup>, Gabriele Pollara<sup>1,9</sup>

7 <sup>1</sup>Division of Infection & Immunity, University College London, London, UK

8 <sup>2</sup>Hospital for Tropical Diseases, University College London Hospitals NHS Trust, London, UK

9 <sup>3</sup>The HRH Prince Alwaleed Bin Talal Bin Abdulaziz Alsaud Institute for Computational Biomedicine, Weill  
10 Cornell Medicine, New York, NY, USA

11 <sup>4</sup>Herbert Irving Comprehensive Cancer Center, Columbia University, New York, NY, USA

12 <sup>5</sup>Department of Systems Biology, Columbia University, New York, NY, USA.

13 <sup>6</sup>Department of Physiology and Biophysics, Weill Cornell Medicine, New York, NY, USA

14 <sup>7</sup>The WorldQuant Initiative for Quantitative Prediction, Weill Cornell Medicine, New York, NY, USA

15 <sup>8</sup>The Feil Family Brain and Mind Research Institute, Weill Cornell Medicine, New York, NY, USA

16 <sup>9</sup>Department of Infection, Royal Free London NHS Trust, London, UK

17

### 18 Corresponding author

19 Dr Gabriele Pollara, Division of Infection & Immunity, Cruciform Building, Gower Street, London, WC1E 6BT,  
20 United Kingdom, [g.pollara@ucl.ac.uk](mailto:g.pollara@ucl.ac.uk). Twitter: [@gpollara](https://twitter.com/gpollara)

21

### 22 Keywords

23 COVID-19, transcriptomics, modules, IL-1 $\beta$ , IL-6

## *IL-1 and IL-6 response modules in COVID-19*

### 24 **Summary**

25 Dysregulated IL-1 $\beta$  and IL-6 responses have been implicated in the pathogenesis of severe Coronavirus  
26 Disease 2019 (COVID-19). Innovative approaches for evaluating the biological activity of these cytokines *in*  
27 *vivo* are urgently needed to complement clinical trials of therapeutic targeting of IL-1 $\beta$  and IL-6 in COVID-19.  
28 We show that the expression of IL-1 $\beta$  or IL-6 inducible transcriptional signatures (modules) reflects the  
29 bioactivity of these cytokines in immunopathology modelled by juvenile idiopathic arthritis (JIA) and  
30 rheumatoid arthritis. In COVID-19, elevated expression of IL-1 $\beta$  and IL-6 response modules, but not the  
31 cytokine transcripts themselves, is a feature of infection in the nasopharynx and blood, but is not associated  
32 with severity of COVID-19 disease, length of stay or mortality. We propose that IL-1 $\beta$  and IL-6 transcriptional  
33 response modules provide a dynamic readout of functional cytokine activity *in vivo*, aiding quantification of  
34 the biological effects of immunomodulatory therapies in COVID-19.

35

### 36 *Abstract word count*

37 145 words

38

## IL-1 and IL-6 response modules in COVID-19

### 39 Introduction

40 Severe Coronavirus Disease 2019 (COVID-19) typically occurs over a week from symptom onset, when viral  
41 titres have diminished, suggesting a dysregulated host inflammatory response may be driving the  
42 pathogenesis of severe disease (Bullard et al., 2020; Huang et al., 2020; McGonagle et al., 2020). Elevated IL-  
43 1 $\beta$  and IL-6 responses have each been associated with disease severity (Huang et al., 2020; Liao et al., 2020;  
44 Qin et al., 2020; Ravindra et al., 2020; Zhang et al., 2020; Zhou et al., 2020b). In addition, the  
45 hyperinflammatory state in COVID-19 is reported to resemble some aspects of haemophagocytic  
46 lymphohistiocytosis (HLH), a condition that may benefit from therapeutic IL-1 $\beta$  blockade (Mehta et al.,  
47 2020). These observations have generated hypotheses that IL-1 $\beta$  and/or IL-6 may be key drivers of pathology  
48 in severe COVID-19, and led to clinical trials of IL-1 $\beta$  and IL-6 antagonists in this context (Maes et al., 2020).  
49 Randomised studies to date investigating the role of tocilizumab, a humanised monoclonal antibody against  
50 the IL-6 receptor, have shown no clinical benefit, but immunophenotyping beyond the measurement of  
51 single cytokines, before or after drug administration, was not recorded or correlated with clinical responses  
52 at the individual patient level (Hermine et al., 2020; Salvarani et al., 2020; Stone et al., 2020).

53 The measurement of individual cytokines at the protein or RNA level may not reflect their biological activity  
54 accurately within multivariate immune systems that incorporate redundancy and feedback loops. To address  
55 this limitation, we have previously derived and validated gene expression signatures, or modules,  
56 representing the transcriptional response to cytokine stimulation, using them to measure functional  
57 cytokine activity within genome-wide transcriptomic data from clinical samples (Bell et al., 2016; Byng-  
58 Maddick et al., 2017; Dheda et al., 2019; Pollara et al., 2017). However, transcriptional modules to quantify  
59 IL-1 $\beta$  or IL-6 response have not been used in COVID-19 to quantify the bioactivity of these cytokine pathways  
60 *in vivo*. In the present study, we have sought to address this gap, describing the derivation and validation of  
61 IL-1 $\beta$  and IL-6 inducible transcriptional modules, and testing the hypothesis that these modules can be used  
62 in the molecular assessment of the pathophysiology and the response to therapeutic cytokine blockade of  
63 inflammatory conditions, including COVID-19.

64

### 65 Results

#### 66 *Identification and validation of IL-1 $\beta$ and IL-6 transcriptional modules*

67 We first sought to derive transcriptional modules that identified and discriminated between the response to  
68 IL-1 $\beta$  and IL-6 stimulation. We have previously derived an IL-1 $\beta$  response module from cytokine stimulated  
69 fibroblasts (table S2) (Pollara et al., 2019). As in our prior studies (Bell et al., 2016; Pollara et al., 2017, 2019),  
70 we used the geometric mean of the constituent genes in a module as a summary statistic to describe the

### *IL-1 and IL-6 response modules in COVID-19*

71 relative expression of the module. We demonstrate that in both monocyte-derived macrophages (MDM)  
72 and peripheral blood mononuclear cells (PBMC) (Boisson et al., 2012; Jura et al., 2008), IL-1 $\beta$  stimulation  
73 induced greater expression of the IL-1 $\beta$  response module than either IL-6 or TNF $\alpha$  stimulation, where there  
74 was no increased expression above unstimulated cells (Fig 1A + B). To identify an IL-6 response module  
75 which was able to discriminate from the effects of IL-1 $\beta$ , we identified one study that had stimulated human  
76 MDM with either IL-1 $\beta$  (15 ng/ml) or IL-6 (25 ng/ml) for 4 hours (Jura et al., 2008). Hierarchical clustering  
77 identified genes induced by IL-6 but not IL-1 $\beta$ , and we termed this the IL-6 response module (table S2).  
78 Internal validation of this module confirmed increased expression in IL-6 stimulated MDM (fig 1A). Testing  
79 the IL-6 module in other datasets demonstrated elevated expression following IL-6, but not TNF $\alpha$ ,  
80 stimulation of human kidney epithelial and macrophage cell lines (Das et al., 2020; O’Brown et al., 2015) (figs  
81 1C+D), whereas no elevated expression of the IL-6 module was observed following IL-1 $\beta$  or TNF $\alpha$  stimulation  
82 of MDM or PBMC (figs 1A+B). These findings demonstrated that the IL-1 $\beta$  and IL-6 response modules could  
83 detect the effects of their cognate cytokines, and discriminate these from each other and from an  
84 alternative inflammatory cytokine stimulus, TNF $\alpha$ .

85

### *IL-1 $\beta$ and IL-6 module expression in chronic inflammation*

86 To determine whether IL-1 $\beta$  and IL-6 response modules were able to detect elevated cytokine bioactivity *in*  
87 *vivo*, we assessed the blood transcriptome of juvenile idiopathic arthritis (JIA) and rheumatoid arthritis (RA)  
88 patients. These are conditions in which elevated IL-1 $\beta$  and IL-6 activity are considered to play a key role in  
89 disease pathogenesis, evidenced by clinical improvement following therapeutic antagonism of these  
90 cytokines (De Benedetti et al., 2012; Fleischmann, 2017; Nikfar et al., 2018; Ruperto et al., 2012). The blood  
91 transcriptome of untreated JIA patients displayed elevated IL-1 $\beta$  and IL-6 bioactivity (fig 2A) (Brachat et al.,  
92 2017), but this was not consistently evident in several RA blood transcriptome datasets (fig S1) (Lee et al.,  
93 2020; Macías-Segura et al., 2018; Tasaki et al., 2018). Discrepancies between molecular changes in blood and  
94 tissues have been previously described in RA (Lee et al., 2020), and therefore we tested the hypothesis that  
95 in contrast to blood, elevated IL-1 $\beta$  and IL-6 bioactivity was a feature of the synovium in RA. Consistent with  
96 this hypothesis, a separate transcriptomic dataset of synovial membrane biopsies from patients with RA  
97 (Broeren et al., 2016) showed elevated levels of both IL-1 $\beta$  and IL-6 response module expression compared  
98 to non-RA synovium (fig 2B).

100 We used the elevated cytokine activity in the blood of JIA patients to test the hypothesis that therapeutic  
101 cytokine modulation would result in changes in cytokine bioactivity as determined by module expression.  
102 We made use of the blood transcriptome of JIA patients 3 days following administration of canakinumab, a  
103 human monoclonal antibody to IL-1 $\beta$  (Brachat et al., 2017). Patients who had a therapeutic response to

### *IL-1 and IL-6 response modules in COVID-19*

104 canakinumab showed elevated IL-1 $\beta$  module expression which reduced 3 days after canakinumab  
105 administration (fig 3A). In contrast, in those who had no treatment response, IL-1 $\beta$  module expression was  
106 lower at baseline and was unaffected by canakinumab (fig 3A). Unlike the differences seen in the IL-1 $\beta$   
107 module between responders and non-responders, there were no differences between these groups in IL-6  
108 module expression at baseline (fig 3B). This indicated that these two cytokine response modules quantified  
109 two distinct biological processes. Interestingly, expression of the IL-6 module was also diminished after  
110 canakinumab treatment in patients who responded to treatment, suggesting that IL-6 activity may be  
111 downstream of IL-1 $\beta$  in this context. Of note in these populations, the expression of the *IL1B* gene correlated  
112 with that of the IL-1 $\beta$  response module, but the same was not evident between IL-6 module and *IL6* gene  
113 expression (fig 3C), illustrating an example in which cytokine gene expression itself may not necessarily  
114 reflect the functional activity of that cytokine.

### *IL-1 $\beta$ and IL-6 bioactivity in COVID-19*

116 We tested the hypothesis that elevated IL-1 $\beta$  and IL-6 bioactivity is a feature of COVID-19 disease. We  
117 initially explored the induction of IL-1 $\beta$  and IL-6 activity at the site of COVID-19 disease, by profiling  
118 transcriptional responses in nasopharyngeal swabs from 495 control and 155 SARS-CoV-2 infected  
119 individuals (Butler et al., 2020; Ramlall et al., 2020). Gene set enrichment analysis (GSEA) was used as an  
120 alternate method of module enrichment scoring (Subramanian et al., 2005), in line with previous analyses of  
121 this data set (Ramlall et al., 2020). While the IL-1 $\beta$  response module was modestly induced by SARS-CoV-2  
122 infection, the IL-6 response module was significantly enriched in transcriptional programs induced by this  
123 viral infection (fig 4). Moreover, we found that SARS-CoV-2 viral loads were positively associated with  
124 cytokine activity, with enrichment of IL-1 $\beta$  and IL-6 responses observed in individuals with the upper tertile  
125 of measured viral loads, while patients with the lowest tertile viral titres did not show induction of responses  
126 to either cytokine (fig 4). The greatest IL-6 responses were in fact observed in individuals with intermediate  
127 viral titres, in whom significant induction of IL-1 $\beta$  activity was not seen (fig 4). Together, these findings  
128 suggest that both IL-1 $\beta$  and IL-6 activity are a feature of the host response at the site of SARS-CoV-2  
129 infection, and are likely to be driven by increasing viral replication *in vivo*.

130 As clinical deterioration in COVID-19 occurs after peak viral replication in the airways has subsided, we  
131 tested the hypothesis that IL-1 $\beta$  and IL-6 activity was also related to disease severity. We initially explored IL-  
132 1 $\beta$  and IL-6 activity in the blood of 3 patients with mild-moderate COVID-19 disease who were admitted to  
133 hospital and recovered (Ong et al., 2020). This dataset was generated using the Nanostring system and  
134 consisted of 579 mRNA targets, which included only 7/57 (12.2%) and 7/41 (17.1%) constituent genes of the  
135 IL-1 $\beta$  and IL-6 response modules respectively (table S2). We demonstrated that IL-1 $\beta$  and IL-6 submodules,  
136 generated from these shorter lists of constituent genes, were still able to recapitulate all the findings from  
137 fig 3 (fig S2). The expression of these submodules in the blood transcriptome of this small number of COVID-

## IL-1 and IL-6 response modules in COVID-19

138 19 patients revealed variation in IL-1 $\beta$  and IL-6 bioactivity over the period of hospitalisation, with higher  
139 expression seen earlier during hospital admission and a reduction as patients recovered (Fig 5A). This time-  
140 associated relationship with clinical recovery was not seen for the expression of the *IL1A*, *IL1B* and *IL6* genes  
141 (fig 5A). We extended these analyses by assessing the transcriptome of blood samples collected at the time  
142 of hospital admission from 32 COVID-19 patients presenting with varying levels of disease severity (Hadjadj  
143 et al., 2020). These data, also collected using the Nanostring system, revealed expression of the IL-1 $\beta$  and IL-  
144 6 cytokine submodules was clearly elevated in COVID-19 compared to healthy controls (fig 5B). However,  
145 strikingly, there was only minimal variability in IL-1 $\beta$  and no variability in IL-6 submodule expression between  
146 the different levels of COVID-19 disease severity (fig 5B).

147 Finally, we tested the hypothesis that elevated IL-1 $\beta$  and IL-6 transcriptional activity in blood could predict  
148 clinical outcome in COVID-19. We assessed the transcriptome of blood leucocytes from 101 COVID-19 and 24  
149 non-COVID-19 patients admitted to hospital (Overmyer et al., 2020). As seen in the whole blood  
150 transcriptome analysis (fig 5), leucocytes from COVID-19 patients also demonstrated elevated IL-1 $\beta$  and IL-6  
151 module activity compared to controls (fig 6A), and once again this distinction was not seen in *IL1A*, *IL1B* and  
152 *IL6* gene expression (fig S3). Clinical outcome in this cohort was determined from the number of hospital free  
153 days at day 45 (HFD-45) following hospital admission, whereby zero days indicated continued admission or  
154 death (Overmyer et al., 2020). Prognostication models have identified decreased lymphocyte counts as  
155 predictors of clinical deterioration (Gupta et al., 2020). Focusing on COVID-19 patients not requiring ICU  
156 admission, we reproduced this observation, demonstrating a positive correlation between HFD-45 and the  
157 expression of a transcriptional module that reflects T cell frequency *in vivo* (Pollara et al., 2017) (fig 6B). In  
158 contrast, neither IL-1 $\beta$  nor IL-6 response module expression at the time of study recruitment was associated  
159 with HFD-45, indicating that, in this dataset, transcriptional activity of these cytokines was not predictive of  
160 clinical outcome from COVID-19 infection (fig 6B).

## 161 Discussion

162 The protracted clinical course, inverse relationship between viral load and symptom progression, and the  
163 association between inflammation and worse clinical outcomes support a hypothesis whereby severe  
164 COVID-19 disease is predominantly driven by an exaggerated inflammatory response (Bullard et al., 2020;  
165 Huang et al., 2020). Both IL-1 $\beta$  and IL-6 may play a role in this process (Huang et al., 2020; Liao et al., 2020;  
166 Qin et al., 2020; Ravindra et al., 2020; Zhang et al., 2020; Zhou et al., 2020a), and cytokine modulating  
167 therapies are now being tested in COVID-19 clinical trials. In this study we utilised transcriptional modules  
168 derived from cytokine stimulated cells to demonstrate that their expression, but not that of their cognate  
169 cytokine genes, provided a quantitative readout for cytokine bioactivity *in vivo*, both in the context of  
170 COVID-19 and chronic inflammatory conditions.

## *IL-1 and IL-6 response modules in COVID-19*

171 We show that in COVID-19, IL-1 $\beta$  and IL-6 cytokine activity is detectable at a site of disease, the nasopharynx,  
172 where greater IL-6 bioactivity in particular is associated with higher levels of SARS-CoV-2 detected. This  
173 finding indicates that the presence of viral antigen is associated with IL-6 mediated inflammation, although  
174 we cannot ascertain from these experiments whether IL-6 inflammation persists in tissues in the later stages  
175 of severe COVID-19 when viral titres diminish (Bullard et al., 2020). The elevated cytokine responses seen in  
176 nasopharyngeal tissues were also detectable in the transcriptome of whole blood and isolated leucocytes  
177 from COVID-19 patients compared to the control populations available, although this analysis merits being  
178 extended to include a wider array of conditions associated with hyperinflammation (Leisman et al., 2020).  
179 Although a reduction in cytokine activity tracked clinical recovery from illness, IL-1 $\beta$  and IL-6 activity at the  
180 time of hospital attendance was not predictive for clinical outcome, and, in contrast to the association seen  
181 with circulating levels of IL-6 protein (Thwaites et al., 2020), we observed no clear gradient of IL-1 $\beta$  or IL-6  
182 response module expression with disease severity. Our findings may help explain the recent results from  
183 randomised studies whereby neutralisation of IL-6 activity by tocilizumab did not show a benefit in mortality  
184 or clinical recovery in patients with severe COVID-19 (Hermine et al., 2020; Salvarani et al., 2020; Stone et  
185 al., 2020). However, these studies did not record IL-6 activity before or after tocilizumab administration,  
186 precluding associations between cytokine activity, neutralisation efficiency and clinical outcomes. We  
187 propose that future randomised trials will need to incorporate assessments of cytokine activity in study  
188 protocols to permit mechanistic correlations between immunomodulatory interventions and disease  
189 outcomes, promoting a stratified medicine approach to host-directed therapies in COVID-19.

190 A consistent observation in our work was that transcriptional modules identified differences between  
191 patient groups that would not otherwise have been detected by assessment of cognate gene transcripts. An  
192 interpretation of these findings is that the downstream response to cytokine stimulation is more persistent  
193 than the expression of the cytokine gene mRNA, the stability of which is subject to trans-regulatory factors  
194 and feedback loops (Iwasaki et al., 2011; Seko et al., 2006). Moreover, transcriptional modules are  
195 intrinsically composed of genes with co-correlated expression, minimising technical confounding of single  
196 gene measurements, demonstrated by the strongly concordant expression between the full and Nanostring  
197 subset IL-1 $\beta$  and IL-6 response modules. These factors may explain the discordance recorded between IL-6  
198 gene expression and protein secretion in COVID-19 (Hadjadj et al., 2020). Moreover, cytokine levels after  
199 modulation *in vivo* do not necessarily reflect bioactivity, exemplified by the rise in IL-6 in blood following  
200 administration of tocilizumab (Nishimoto et al., 2008). We propose that cytokine response modules  
201 overcome both issues by integrating the culmination of cytokine signalling events, and may be used as an *in*  
202 *vivo* biomonitor of cytokine activity (Hedrick et al., 2020).

203 Our study has limitations. Despite drawing on four independent COVID-19 datasets, the sample sizes  
204 assessed in our study were still modest, especially for longitudinal samples, but this was limited by the data

205

## IL-1 and IL-6 response modules in COVID-19

206 available. Assessments of the transcriptome from leucocytes and whole blood in COVID-19 may not be  
207 interchangeable and will need cross-validating, although both datasets demonstrated no association  
208 between IL-1 $\beta$  or IL-6 activity and severity of disease. Determining the sensitivity and specificity of the IL-1 $\beta$   
209 and IL-6 response modules for their respective cognate cytokines was limited by the available datasets and  
210 the range of cytokine stimulation conditions performed in those experiments. Comparing the expression of  
211 these modules across a wider range of biologically paired cytokine stimulations will allow refinement of their  
212 accuracy. As the modules were generated from *in vitro* experiments, we sought to determine their  
213 applicability *in vivo*, assessing neutralisation of cytokine activity following immunomodulation with biologic  
214 agents *in vivo*. IL-1 $\beta$  activity in blood and in tissues was diminished days after canakinumab (fig 3) and  
215 anakinra (Pollara et al., 2019) administration respectively, but no equivalent datasets were available to  
216 assess the IL-6 response module in the same manner. Biobanked samples from ongoing tocilizumab clinical  
217 trials in COVID-19 and other diseases may provide an opportunity to validate IL-6 module performance in  
218 this way.

219 In conclusion, our data demonstrate elevated activity of the inflammatory cytokines IL-1 $\beta$  and IL-6 in COVID-  
220 19 in blood and tissues, and demonstrate the utility of cytokine transcriptional response modules in  
221 providing a dynamic readout of the activity of these pathways *in vivo*. We propose that use of these modules  
222 may enhance efforts to investigate the pathology of COVID-19, support development of methods to stratify  
223 patients' risk of clinical progression, and aid quantification of the biological effects of host-directed  
224 immunomodulatory therapeutics in COVID-19.

## 225 STAR methods

### 226 Datasets

227 All datasets used are provided in table S1. Data matrices were obtained from processed data series  
228 downloaded from the NCBI Gene Expression Omnibus (GEO) (<https://www.ncbi.nlm.nih.gov/geo/>) or Array  
229 Express repository (<https://www.ebi.ac.uk/arrayexpress/>). Probe identifiers were converted to gene symbols  
230 using platform annotations provided with each dataset. In circumstances where downloaded datasets were  
231 not log<sub>2</sub> transformed, this was performed on the entire processed data matrix. Duplicate genes were  
232 removed after the first one identified using Microsoft Excel duplicate remover function.

### 233 IL-1 $\beta$ and IL-6 module derivation

234 We previously derived an IL-1 $\beta$  transcriptional module from the transcriptome of fibroblasts stimulated with  
235 IL-1 $\beta$  or TNF $\alpha$  (Pollara et al., 2019). We derived a novel IL-6 transcriptional response module from a publicly  
236 available dataset (table S1) reporting experiments of human monocyte-derived macrophages (MDM)  
237 stimulated with IL-1 $\beta$  (15 ng/ml) or IL-6 (25 ng/ml) for 4 hours (Jura et al., 2008). In this study the  
238 transcriptional programme of cytokine-stimulated MDM was assessed by microarrays and hierarchical



## *IL-1 and IL-6 response modules in COVID-19*

239 clustering was performed using Euclidean distance and average linkage method. This approach identified  
240 several unique clusters of genes differentially expressed following stimulation with each cytokine. Genes in  
241 clusters D & E showed elevated expression following stimulation by IL-6, but not by IL-1 $\beta$ . We combined the  
242 list of genes within these two clusters, removed duplicate or non-annotated genes, and termed this the IL-6  
243 response module.

244 We applied the above IL-1 $\beta$  and IL-6 response modules to two studies where transcriptional profiling was  
245 performed using the Nanostring nCounter Human Immunology\_v2 panel, which assesses the expression of a  
246 subset of the whole genome (579 genes) (Hadjadj et al., 2020; Ong et al., 2020). Consequently, only a subset  
247 of the modules' constituent genes was present in these datasets (table S2). To verify the validity of applying  
248 our method to these datasets, we generated new cytokine response submodules using only genes from this  
249 subset, and showed them to provide the same discrimination of IL-1 $\beta$  and IL-6 responses as the parent  
250 modules (fig S2).

### *Module expression assessment*

252 The expression of transcriptional modules was derived by calculating the geometric mean expression of all  
253 constituent genes, as previously described (Pollara et al., 2017). The scripts used allowed the absence of a  
254 constituent gene in the analysed dataset, a scenario that did not affect geometric mean calculation. Gene set  
255 enrichment analysis was also used for modular expression assessment in nasopharyngeal samples, as  
256 previously described (Ramlall et al., 2020; Subramanian et al., 2005).

### *Statistical analysis*

258 All module score calculations were calculated in R v3.6.1 and RStudio v1.2.1335, using scripts generated and  
259 deposited in our previous publication (<https://github.com/MJMurray1/MDIScoring>) (Pollara et al., 2017).  
260 Mann-Whitney tests, Spearman rank correlations and Kruskal-Wallis tests were calculated in GraphPad Prism  
261 v8.4. Kruskal-Wallis testing was chosen to determine the presence of variability in the expression of cytokine  
262 response modules or cytokine gene over time since hospital admission (fig 5A) or between different  
263 categories of COVID-19 disease severity (fig 5B). This non-parametric test was chosen as we could not  
264 assume the expression of these variables was Normally distributed. In fig 5A patient samples were aligned  
265 according to days from hospital admission, and then binned into day interval categories (4-6, 7-9, 10-12 and  
266 12+ days following admission), yielding 4, 7, 8 and 3 samples in each group. Kruskal-Wallis testing was  
267 performed on these binned categories to identify variation in the expression of modules or genes between  
268 these categories, with the Bonferroni method used for multiple testing correction.

### *Role of funders*

270 The funding sources played no role in conceiving the study, performing data analyses, preparing the  
271 manuscript or deciding to submit it for publication.

## IL-1 and IL-6 response modules in COVID-19

### 272 *Ethics statement*

273 The manuscript makes use of publicly available datasets, the use of which required no further ethical  
274 approval.

275

### 276 *Author contributions*

277 LCKB, MN and GP conceived the study. LCKB, CM, JK, JF, DB, CEM, SDS and GP performed the analyses. LCKB,  
278 SDS, MN and GP critically appraised the results, drafted the manuscript, and agreed on the data presented  
279 and the conclusions reached in the final version. All authors reviewed and approved the manuscript.

### 280 *Competing interests*

281 No competing interests exist.

### 282 *Data sharing*

283 All transcriptional datasets used in this manuscript were derived from public repositories. Their source is  
284 detailed in table S1 and software used to analyse these data is described in the methods.

### 285 *Funding*

286 This work was supported by grant funding from the Wellcome Trust to MN (207511/Z/17/Z) and GP  
287 (WT101766/Z/13/Z), by Clinical Lectureship and Clinical Fellowship posts funded by the National Institute for  
288 Health Research (NIHR) to GP and LCKB respectively, and by NIH grants 5R01GM109018 and 5U54CA209997  
289 to SDS. CEM would like to thank the Scientific Computing Unit (SCU), XSEDE Supercomputing Resources, the  
290 Starr Cancer Consortium (I13-0052), and funding from the WorldQuant Foundation, The Pershing Square  
291 Sohn Cancer Research Alliance, NASA (NNX14AH50G, NNX17AB26G), the National Institutes of Health  
292 (R21AI129851, R01MH117406, R01AI151059).

293

### 294 *References*

295 Bell, L.C.K., Pollara, G., Pascoe, M., Tomlinson, G.S., Lehloeny, R.J., Roe, J., Meldau, R., Miller, R.F., Ramsay,  
296 A., Chain, B.M., et al. (2016). *In vivo* Molecular Dissection of the Effects of HIV-1 in Active Tuberculosis. *PLoS*  
297 *Pathog.* 12, e1005469.

298 De Benedetti, F., Brunner, H.I., Ruperto, N., Kenwright, A., Wright, S., Calvo, I., Cuttica, R., Ravelli, A.,  
299 Schneider, R., Woo, P., et al. (2012). Randomized trial of tocilizumab in systemic juvenile idiopathic arthritis.  
300 *N. Engl. J. Med.* 367, 2385–2395.

*IL-1 and IL-6 response modules in COVID-19*

- 301 Boisson, B., Laplantine, E., Prando, C., Gilliani, S., Israelsson, E., Xu, Z., Abhyankar, A., Israël, L., Trevejo-  
302 Nunez, G., Bogunovic, D., et al. (2012). Immunodeficiency, autoinflammation and amylopectinosis in humans  
303 with inherited HOIL-1 and LUBAC deficiency. *Nat. Immunol.* *13*, 1178–1186.
- 304 Brachat, A.H., Grom, A.A., Wulffraat, N., Brunner, H.I., Quartier, P., Brik, R., McCann, L., Ozdogan, H.,  
305 Rutkowska-Sak, L., Schneider, R., et al. (2017). Early changes in gene expression and inflammatory proteins in  
306 systemic juvenile idiopathic arthritis patients on canakinumab therapy. *Arthritis Res. Ther.* *19*, 13.
- 307 Broeren, M.G.A., de Vries, M., Bennink, M.B., Arntz, O.J., Blom, A.B., Koenders, M.I., van Lent, P.L.E.M., van  
308 der Kraan, P.M., van den Berg, W.B., and van de Loo, F.A.J. (2016). Disease-Regulated Gene Therapy with  
309 Anti-Inflammatory Interleukin-10 Under the Control of the CXCL10 Promoter for the Treatment of  
310 Rheumatoid Arthritis. *Hum. Gene Ther.* *27*, 244–254.
- 311 Bullard, J., Dust, K., Funk, D., Strong, J.E., Alexander, D., Garnett, L., Boodman, C., Bello, A., Hedley, A.,  
312 Schiffman, Z., et al. (2020). Predicting infectious SARS-CoV-2 from diagnostic samples. *Clin. Infect. Dis.*
- 313 Byng-Maddick, R., Turner, C.T., Pollara, G., Ellis, M., Guppy, N.J., Bell, L.C.K., Ehrenstein, M.R., and  
314 Noursadeghi, M. (2017). Tumor Necrosis Factor (TNF) Bioactivity at the Site of an Acute Cell-Mediated  
315 Immune Response Is Preserved in Rheumatoid Arthritis Patients Responding to Anti-TNF Therapy. *Front.*  
316 *Immunol.* *8*, 932.
- 317 Das, A.S., Basu, A., Kumar, R., Borah, P.K., Bakshi, S., Sharma, M., Duary, R.K., Ray, P.S., and Mukhopadhyay,  
318 R. (2020). Post-transcriptional regulation of C-C motif chemokine ligand 2 expression by ribosomal protein  
319 L22 during LPS-mediated inflammation. *FEBS J.*
- 320 Dheda, K., Lenders, L., Srivastava, S., Magombedze, G., Wainwright, H., Raj, P., Bush, S.J., Pollara, G., Steyn,  
321 R., Davids, M., et al. (2019). Spatial Network Mapping of Pulmonary Multidrug-Resistant Tuberculosis  
322 Cavities Using RNA Sequencing. *Am. J. Respir. Crit. Care Med.*
- 323 Fleischmann, R. (2017). Interleukin-6 inhibition for rheumatoid arthritis. *The Lancet* *389*, 1168–1170.
- 324 Gupta, R.K., Harrison, E.M., Ho, A., Docherty, A.B., Knight, S.R., van Smeden, M., Abubakar, I., Lipman, M.,  
325 Quartagno, M., Pius, R.B., et al. (2020). Development and validation of the 4C Deterioration model for adults  
326 hospitalised with COVID-19. *medRxiv*.
- 327 Hadjadj, J., Yatim, N., Barnabei, L., Corneau, A., Boussier, J., Smith, N., Péré, H., Charbit, B., Bondet, V.,  
328 Chenevier-Gobeaux, C., et al. (2020). Impaired type I interferon activity and inflammatory responses in  
329 severe COVID-19 patients. *Science (80-. )*. *369*, 718–724.
- 330 Hedrick, T.L., Murray, B.P., Hagan, R.S., and Mock, J.R. (2020). COVID-19: Clean up on IL-6. *Am. J. Respir. Cell*  
331 *Mol. Biol.*

*IL-1 and IL-6 response modules in COVID-19*

- 332 Hermine, O., Mariette, X., Tharaux, P.-L., Resche-Rigon, M., Porcher, R., Ravaud, P., and CORIMUNO-19  
333 Collaborative Group (2020). Effect of Tocilizumab vs Usual Care in Adults Hospitalized With COVID-19 and  
334 Moderate or Severe Pneumonia: A Randomized Clinical Trial. *JAMA Intern. Med.*
- 335 Huang, C., Wang, Y., Li, X., Ren, L., Zhao, J., Hu, Y., Zhang, L., Fan, G., Xu, J., Gu, X., et al. (2020). Clinical  
336 features of patients infected with 2019 novel coronavirus in Wuhan, China. *The Lancet* 395, 497–506.
- 337 Iwasaki, H., Takeuchi, O., Teraguchi, S., Matsushita, K., Uehata, T., Kuniyoshi, K., Satoh, T., Saitoh, T.,  
338 Matsushita, M., Standley, D.M., et al. (2011). The  $\kappa$ B kinase complex regulates the stability of cytokine-  
339 encoding mRNA induced by TLR-IL-1R by controlling degradation of regnase-1. *Nat. Immunol.* 12,  
340 1167–1175.
- 341 Jura, J., Wegrzyn, P., Korostyński, M., Guzik, K., Oczko-Wojciechowska, M., Jarzab, M., Kowalska, M.,  
342 Piechota, M., Przewłocki, R., and Koj, A. (2008). Identification of interleukin-1 and interleukin-6-responsive  
343 genes in human monocyte-derived macrophages using microarrays. *Biochim. Biophys. Acta* 1779, 383–389.
- 344 Lee, E.J., Lilja, S., Li, X., Schäfer, S., Zhang, H., and Benson, M. (2020). Bulk and single cell transcriptomic data  
345 indicate that a dichotomy between inflammatory pathways in peripheral blood and arthritic joints  
346 complicates biomarker discovery. *Cytokine* 127, 154960.
- 347 Leisman, D.E., Ronner, L., Pinotti, R., Taylor, M.D., Sinha, P., Calfee, C.S., Hirayama, A.V., Mastroiani, F.,  
348 Turtle, C.J., Harhay, M.O., et al. (2020). Cytokine elevation in severe and critical COVID-19: a rapid systematic  
349 review, meta-analysis, and comparison with other inflammatory syndromes. *Lancet Respir. Med.*
- 350 Liao, M., Liu, Y., Yuan, J., Wen, Y., Xu, G., Zhao, J., Cheng, L., Li, J., Wang, X., Wang, F., et al. (2020). Single-cell  
351 landscape of bronchoalveolar immune cells in patients with COVID-19. *Nat. Med.* 26, 842–844.
- 352 Macías-Segura, N., Castañeda-Delgado, J.E., Bastian, Y., Santiago-Algarra, D., Castillo-Ortiz, J.D., Alemán-  
353 Navarro, A.L., Jaime-Sánchez, E., Gomez-Moreno, M., Saucedo-Toral, C.A., Lara-Ramírez, E.E., et al. (2018).  
354 Transcriptional signature associated with early rheumatoid arthritis and healthy individuals at high risk to  
355 develop the disease. *PLoS One* 13, e0194205.
- 356 Maes, B., Bosteels, C., De Leeuw, E., Declercq, J., Van Damme, K., Delporte, A., Demeyere, B., Vermeersch, S.,  
357 Vuylsteke, M., Willaert, J., et al. (2020). Treatment of severely ill COVID-19 patients with anti-interleukin  
358 drugs (COV-AID): A structured summary of a study protocol for a randomised controlled trial. *Trials* 21, 468.
- 359 McGonagle, D., O'Donnell, J.S., Sharif, K., Emery, P., and Bridgewood, C. (2020). Immune mechanisms of  
360 pulmonary intravascular coagulopathy in COVID-19 pneumonia. *The Lancet Rheumatology* 2, e437–e445.

*IL-1 and IL-6 response modules in COVID-19*

- 361 Mehta, P., McAuley, D.F., Brown, M., Sanchez, E., Tattersall, R.S., Manson, J.J., and HLH Across Speciality  
362 Collaboration, UK (2020). COVID-19: consider cytokine storm syndromes and immunosuppression. *The*  
363 *Lancet* *395*, 1033–1034.
- 364 Nikfar, S., Saiyarsarai, P., Tigabu, B.M., and Abdollahi, M. (2018). Efficacy and safety of interleukin-1  
365 antagonists in rheumatoid arthritis: a systematic review and meta-analysis. *Rheumatol. Int.* *38*, 1363–1383.
- 366 Nishimoto, N., Terao, K., Mima, T., Nakahara, H., Takagi, N., and Kakehi, T. (2008). Mechanisms and  
367 pathologic significances in increase in serum interleukin-6 (IL-6) and soluble IL-6 receptor after  
368 administration of an anti-IL-6 receptor antibody, tocilizumab, in patients with rheumatoid arthritis and  
369 Castleman disease. *Blood* *112*, 3959–3964.
- 370 O’Brown, Z.K., Van Nostrand, E.L., Higgins, J.P., and Kim, S.K. (2015). The Inflammatory Transcription Factors  
371 NFκB, STAT1 and STAT3 Drive Age-Associated Transcriptional Changes in the Human Kidney. *PLoS Genet.* *11*,  
372 e1005734.
- 373 Ong, E.Z., Chan, Y.F.Z., Leong, W.Y., Lee, N.M.Y., Kalimuddin, S., Haja Mohideen, S.M., Chan, K.S., Tan, A.T.,  
374 Bertoletti, A., Ooi, E.E., et al. (2020). A Dynamic Immune Response Shapes COVID-19 Progression. *Cell Host*  
375 *Microbe* *27*, 879–882.e2.
- 376 Overmyer, K.A., Shishkova, E., Miller, I.J., Balnis, J., Bernstein, M.N., Peters-Clarke, T.M., Meyer, J.G., Quan,  
377 Q., Muehlbauer, L.K., Trujillo, E.A., et al. (2020). Large-Scale Multi-omic Analysis of COVID-19 Severity. *Cell*  
378 *Syst.*
- 379 Pollara, G., Murray, M.J., Heather, J.M., Byng-Maddick, R., Guppy, N., Ellis, M., Turner, C.T., Chain, B.M., and  
380 Noursadeghi, M. (2017). Validation of immune cell modules in multicellular transcriptomic data. *PLoS One*  
381 *12*, e0169271.
- 382 Pollara, G., Turner, C.T., Tomlinson, G.S., Bell, L.C., Khan, A., Peralta, L.F., Folino, A., Akarca, A., Venturini, C.,  
383 Baker, T., et al. (2019). Exaggerated *in vivo* IL-17 responses discriminate recall responses in active TB.  
384 *BioRxiv*.
- 385 Qin, C., Zhou, L., Hu, Z., Zhang, S., Yang, S., Tao, Y., Xie, C., Ma, K., Shang, K., Wang, W., et al. (2020).  
386 Dysregulation of Immune Response in Patients With Coronavirus 2019 (COVID-19) in Wuhan, China. *Clin.*  
387 *Infect. Dis.* *71*, 762–768.
- 388 Ramlall, V., Thangaraj, P.M., Meydan, C., Foox, J., Butler, D., Kim, J., May, B., De Freitas, J.K., Glicksberg, B.S.,  
389 Mason, C.E., et al. (2020). Immune complement and coagulation dysfunction in adverse outcomes of SARS-  
390 CoV-2 infection. *Nat. Med.* *26*, 1609–1615.

*IL-1 and IL-6 response modules in COVID-19*

- 391 Ravindra, N.G., Alfajaro, M.M., Gasque, V., Wei, J., Filler, R.B., Huston, N.C., Wan, H., Szigeti-Buck, K., Wang,  
392 B., Montgomery, R.R., et al. (2020). Single-cell longitudinal analysis of SARS-CoV-2 infection in human  
393 bronchial epithelial cells. *BioRxiv*.
- 394 Ruperto, N., Brunner, H.I., Quartier, P., Constantin, T., Wulffraat, N., Horneff, G., Brik, R., McCann, L.,  
395 Kasapcopur, O., Rutkowska-Sak, L., et al. (2012). Two randomized trials of canakinumab in systemic juvenile  
396 idiopathic arthritis. *N. Engl. J. Med.* 367, 2396–2406.
- 397 Salvarani, C., Dolci, G., Massari, M., Merlo, D.F., Cavuto, S., Savoldi, L., Bruzzi, P., Boni, F., Braglia, L., Turrà, C.,  
398 et al. (2020). Effect of Tocilizumab vs Standard Care on Clinical Worsening in Patients Hospitalized With  
399 COVID-19 Pneumonia: A Randomized Clinical Trial. *JAMA Intern. Med.*
- 400 Seko, Y., Cole, S., Kasprzak, W., Shapiro, B.A., and Ragheb, J.A. (2006). The role of cytokine mRNA stability in  
401 the pathogenesis of autoimmune disease. *Autoimmun Rev.* 5, 299–305.
- 402 Stone, J.H., Frigault, M.J., Serling-Boyd, N.J., Fernandes, A.D., Harvey, L., Foulkes, A.S., Horick, N.K., Healy,  
403 B.C., Shah, R., Bensaci, A.M., et al. (2020). Efficacy of Tocilizumab in Patients Hospitalized with Covid-19. *N.*  
404 *Engl. J. Med.*
- 405 Subramanian, A., Tamayo, P., Mootha, V.K., Mukherjee, S., Ebert, B.L., Gillette, M.A., Paulovich, A., Pomeroy,  
406 S.L., Golub, T.R., Lander, E.S., et al. (2005). Gene set enrichment analysis: a knowledge-based approach for  
407 interpreting genome-wide expression profiles. *Proc. Natl. Acad. Sci. USA* 102, 15545–15550.
- 408 Tasaki, S., Suzuki, K., Kassai, Y., Takeshita, M., Murota, A., Kondo, Y., Ando, T., Nakayama, Y., Okuzono, Y.,  
409 Takiguchi, M., et al. (2018). Multi-omics monitoring of drug response in rheumatoid arthritis in pursuit of  
410 molecular remission. *Nat Commun* 9, 2755.
- 411 Thwaites, R., Sanchez Sevilla Uruchurtu, A., Siggins, M., Liew, F., Russell, C.D., Moore, S., Carter, E., Abrams,  
412 S., Short, C.-E., Thaventhiran, T., et al. (2020). Elevated antiviral, myeloid and endothelial inflammatory  
413 markers in severe COVID-19. *medRxiv*.
- 414 Zhang, X., Tan, Y., Ling, Y., Lu, G., Liu, F., Yi, Z., Jia, X., Wu, M., Shi, B., Xu, S., et al. (2020). Viral and host  
415 factors related to the clinical outcome of COVID-19. *Nature* 583, 437–440.
- 416 Zhou, F., Yu, T., Du, R., Fan, G., Liu, Y., Liu, Z., Xiang, J., Wang, Y., Song, B., Gu, X., et al. (2020a). Clinical  
417 course and risk factors for mortality of adult inpatients with COVID-19 in Wuhan, China: a retrospective  
418 cohort study. *The Lancet* 395, 1054–1062.
- 419 Zhou, Z., Ren, L., Zhang, L., Zhong, J., Xiao, Y., Jia, Z., Guo, L., Yang, J., Wang, C., Jiang, S., et al. (2020b). Overly  
420 Exuberant Innate Immune Response to SARS-CoV-2 Infection. *SSRN Journal*.

*IL-1 and IL-6 response modules in COVID-19*

421

422

## IL-1 and IL-6 response modules in COVID-19

### 423 Figure legends

424 **Figure 1.** Validation of cytokine response modules. Geometric mean module expression in A) MDM  
425 stimulated *in vitro* with either IL-1 $\beta$  (15 ng/ml) or IL-6 (25 ng/ml) for 4 hours (Jura et al., 2008), B) PBMC  
426 stimulated with TNF $\alpha$  (20 ng/ml) or IL-1 $\beta$  (10 ng/ml) for 6 hours (Boisson et al., 2012), C) human renal  
427 proximal tubular epithelial (HK-2) cells stimulated with IL-6 (200 ng/ml) or TNF $\alpha$  (100 ng/ml) for 1.5 hours  
428 (O’Brown et al., 2015) and D) human macrophage cell lines (THP-1) stimulated with IL-6 (50 ng/ml) or TNF $\alpha$   
429 (10 ng/ml) for 2 hours (Das et al., 2020). Transcriptomic datasets are designated adjacent to figure panels. \*  
430 =  $p < 0.05$  by Mann-Whitney test.

431 **Figure 2.** Cytokine response module expression in chronic inflammatory conditions. Geometric mean  
432 expression of IL-1 $\beta$  and IL-6 cytokine response modules in A) blood of patients with JIA compared to healthy  
433 controls (Brachat et al., 2017), and B) in the synovium of RA patients compared to that of healthy controls  
434 (Broeren et al., 2016). Transcriptomic datasets are designated adjacent to figure panels. \* =  $p < 0.05$  by  
435 Mann-Whitney test.

436 **Figure 3.** Effect of canakinumab on expression of cytokine response modules and genes. A) Geometric mean  
437 expression of IL-1 $\beta$  and IL-6 cytokine response modules in JIA patients before and 3 days after administration  
438 of canakinumab (Brachat et al., 2017). Patients were subdivided into good responders (90-100%  
439 improvement) and non-responders (0-30% improvement). Dotted lines indicate median module or gene  
440 expression in healthy controls (HC) population in same dataset. \* =  $p < 0.05$  by Mann-Whitney test. B)  
441 Relationship between expression of cytokine response modules and cytokine genes. Statistical assessment of  
442 correlation made by Spearman Rank correlation.  $r$  = correlation coefficient. Transcriptomic dataset  
443 designated adjacent to figure panels.

444 **Figure 4.** Cytokine response modules at the site of disease in COVID-19. A) Gene set enrichment analysis  
445 (GSEA) of the IL-1 $\beta$  and IL-6 modules was applied to nasopharyngeal swabs from SARS-CoV-2 infected and  
446 uninfected individuals. Patients were stratified into low (pink), medium (orange) and high (red) viral loads as  
447 previously described (Ramlall et al., 2020). GSEA was used to determine the level of engagement for the  
448 respective modules in the context of SARS-CoV-2 infection (Subramanian et al., 2005), in line with previously  
449 published analysis of this data set (Ramlall et al., 2020). Normalised enrichment scores (NES) are shown on  
450 the x axes and measurement of statistical significance (false detection rate q-value) is shown on the y axes.  
451 The threshold for significance ( $q=0.05$ ) is shown by the dotted lines; data points below the dotted lines are  
452 significantly enriched for the relevant module in each group of SARS-CoV-2 positive patients, in comparison  
453 to the control group. B) Leading edge enrichment plots from GSEA of the cytokine modules for each  
454 comparison.



*IL-1 and IL-6 response modules in COVID-19*

455 **Figure 5.** Cytokine response module and gene expression in COVID-19 blood samples. A) Geometric mean  
456 expression of IL-1 $\beta$  and IL-6 response module and *IL1A*, *IL1B* and *IL6* gene expression in patients admitted  
457 with COVID-19 (Ong et al., 2020). Number of patient samples at each timepoint designated on first plot of  
458 each row, but applicable for all panels. Where more than one sample was available at any time point, the  
459 mean expression +/- SEM is plotted. Kruskal-Wallis test was performed on binned time points 4-6, 7-9, 10-  
460 12 and 12+ days following hospitalisation, corresponding to 4, 7, 8 and 3 samples in each of these categories.  
461 The p values shown represent Kruskal-Wallis tests with time since hospital admission as the independent  
462 variable, where a threshold of 0.01 (corrected for multiple testing by the Bonferroni method) is required for  
463 a single test to be classed as significant (significant p-values indicated in bold text). B) Geometric mean  
464 expression of IL-1 $\beta$  and IL-6 response modules in whole blood transcriptomic profiles from patients admitted  
465 with moderate (n=11) severe (n=10) or critical (n=11) COVID-19, in comparison to healthy controls (n=13)  
466 (Hadjadj et al., 2020). In this study, samples were collected from patients at the time of admission to  
467 hospital, a median of 10 days (IQR 9 – 11 days) from symptom onset. A Mann-Whitney test was used to  
468 assess differences in module expression between all COVID-19 patients and healthy controls (\* = p < 0.05),  
469 and a Kruskal-Wallis test was used to determine variability in module expression between the grades of  
470 COVID-19 disease severity.

471 **Figure 6.** Relationship between cytokine response module expression at admission in COVID-19 and clinical  
472 outcome. A) Geometric mean expression of IL-1 $\beta$  and IL-6 response modules in transcriptomic profiles of  
473 blood leucocytes collected from 101 COVID-19 and 24 non-COVID-19 patients. In this study, samples were  
474 collected from patients at a median of 3.37 days from admission to hospital (Overmyer et al., 2020) . B) In  
475 patients from this cohort who were not admitted to ITU, the relationship between expression of cytokine  
476 response modules, or a previously validated T-cell module (Pollara et al., 2017), and the number of hospital  
477 free days at day 45 (HFD-45) following hospital admission (whereby zero days indicated continued admission  
478 or death) is shown. Statistical assessment of correlation made by Spearman Rank correlation. r = correlation  
479 coefficient.

480

481

## *IL-1 and IL-6 response modules in COVID-19*

### 482 Supplemental figure legends

483 **Figure S1.** Cytokine response module expression in the blood of rheumatoid arthritis (RA) patients.  
484 Geometric mean expression of IL-1 $\beta$  and IL-6 cytokine response modules in the transcriptome of blood  
485 samples from RA patients compared to healthy controls. \* =  $p < 0.05$  by Mann-Whitney test. Transcriptomic  
486 datasets assessed are designated adjacent to each figure panel.

487 **Figure S2.** Effect of canakinumab on expression of cytokine genes and response submodules. A) Geometric  
488 mean expression of IL-1 and IL-6 cytokine response submodules in JIA patients before and 3 days after  
489 administration of canakinumab. Patients were subdivided into good responders (90-100% improvement) and  
490 non-responders (0-30% improvement). Dotted lines indicate median module or gene expression in healthy  
491 controls (HC) population in same dataset. \* =  $p < 0.05$  by Mann-Whitney test. B) Relationship between  
492 expression of cytokine response modules and cytokine genes. Statistical assessment of correlation made by  
493 Spearman Rank correlation.  $r$  = correlation coefficient. Transcriptomic dataset designated adjacent to figure  
494 panels.

495 **Figure S3.** Cytokine gene expression in leucocytes of admitted patients with and without COVID-19.  
496 Expression of *IL1A*, *IL1B* and *IL6* genes in transcriptomic profiles of blood leucocytes collected from 101  
497 COVID-19 and 24 non-COVID-19 patients. In this study, samples were collected from patients at a median of  
498 3.37 days from admission to hospital (Overmyer et al., 2020) . All comparisons were not significant by Mann-  
499 Whitney test. Transcriptomic dataset assessed are designated adjacent to each figure panel.

**Figure 1**

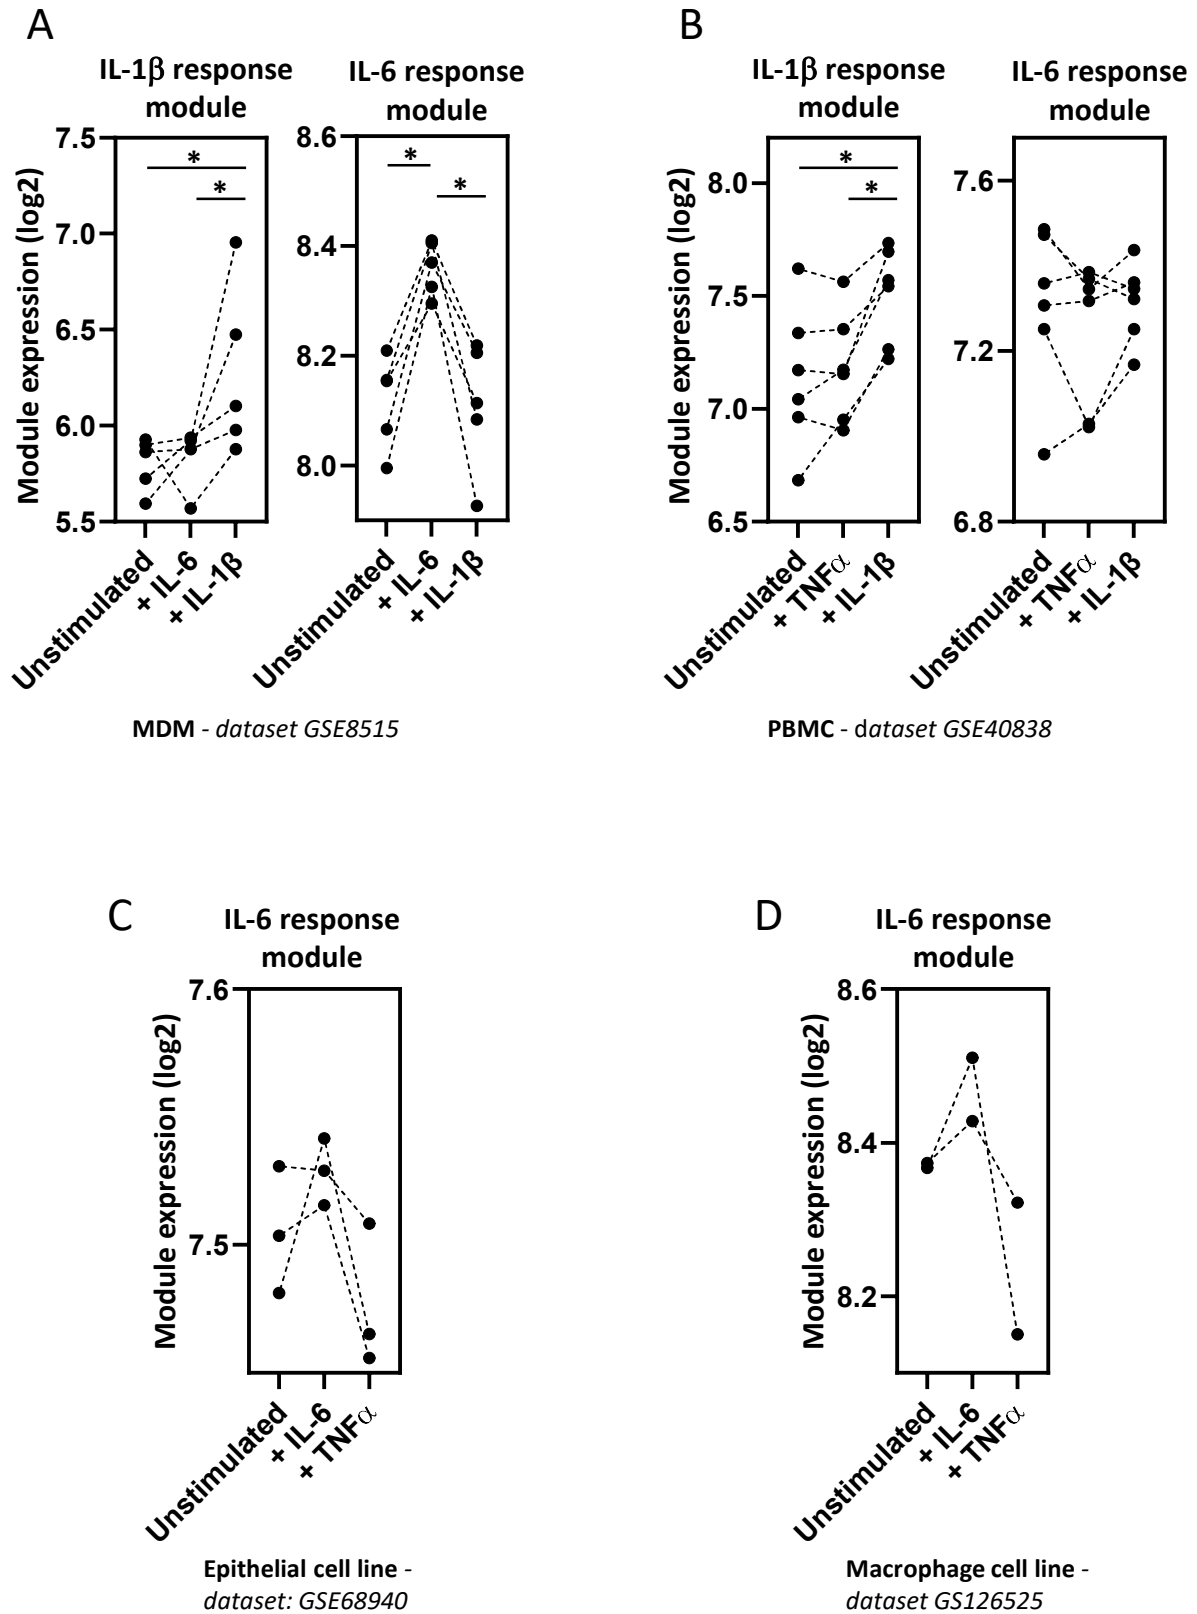

## Figure 2

A

IL-1 $\beta$  response module    IL-6 response module

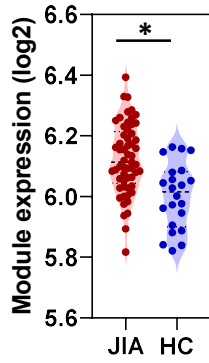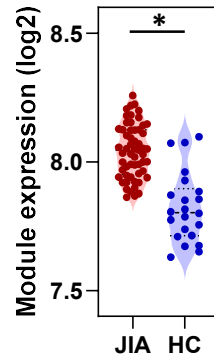

JIA blood - dataset GSE80060

B

IL-1 $\beta$  response module    IL-6 response module

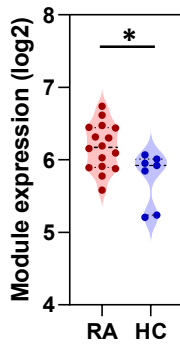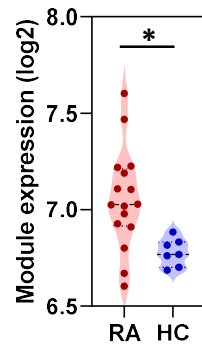

RA synovium - dataset GSE77298

## Figure 3

A

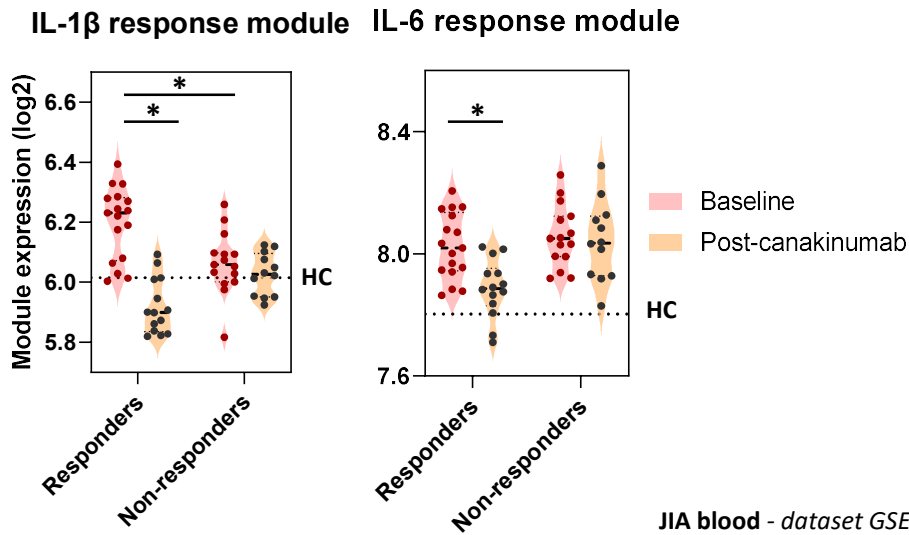

B

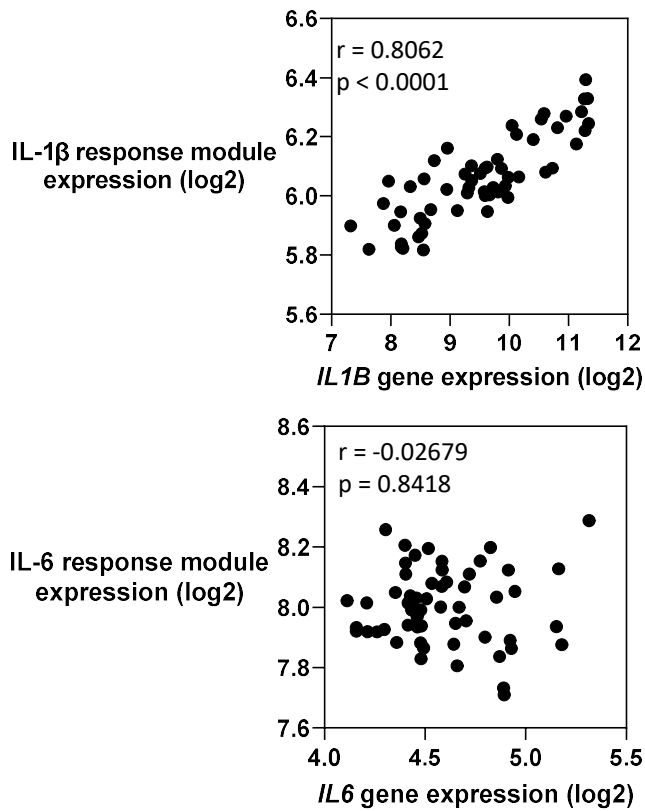

## Figure 4

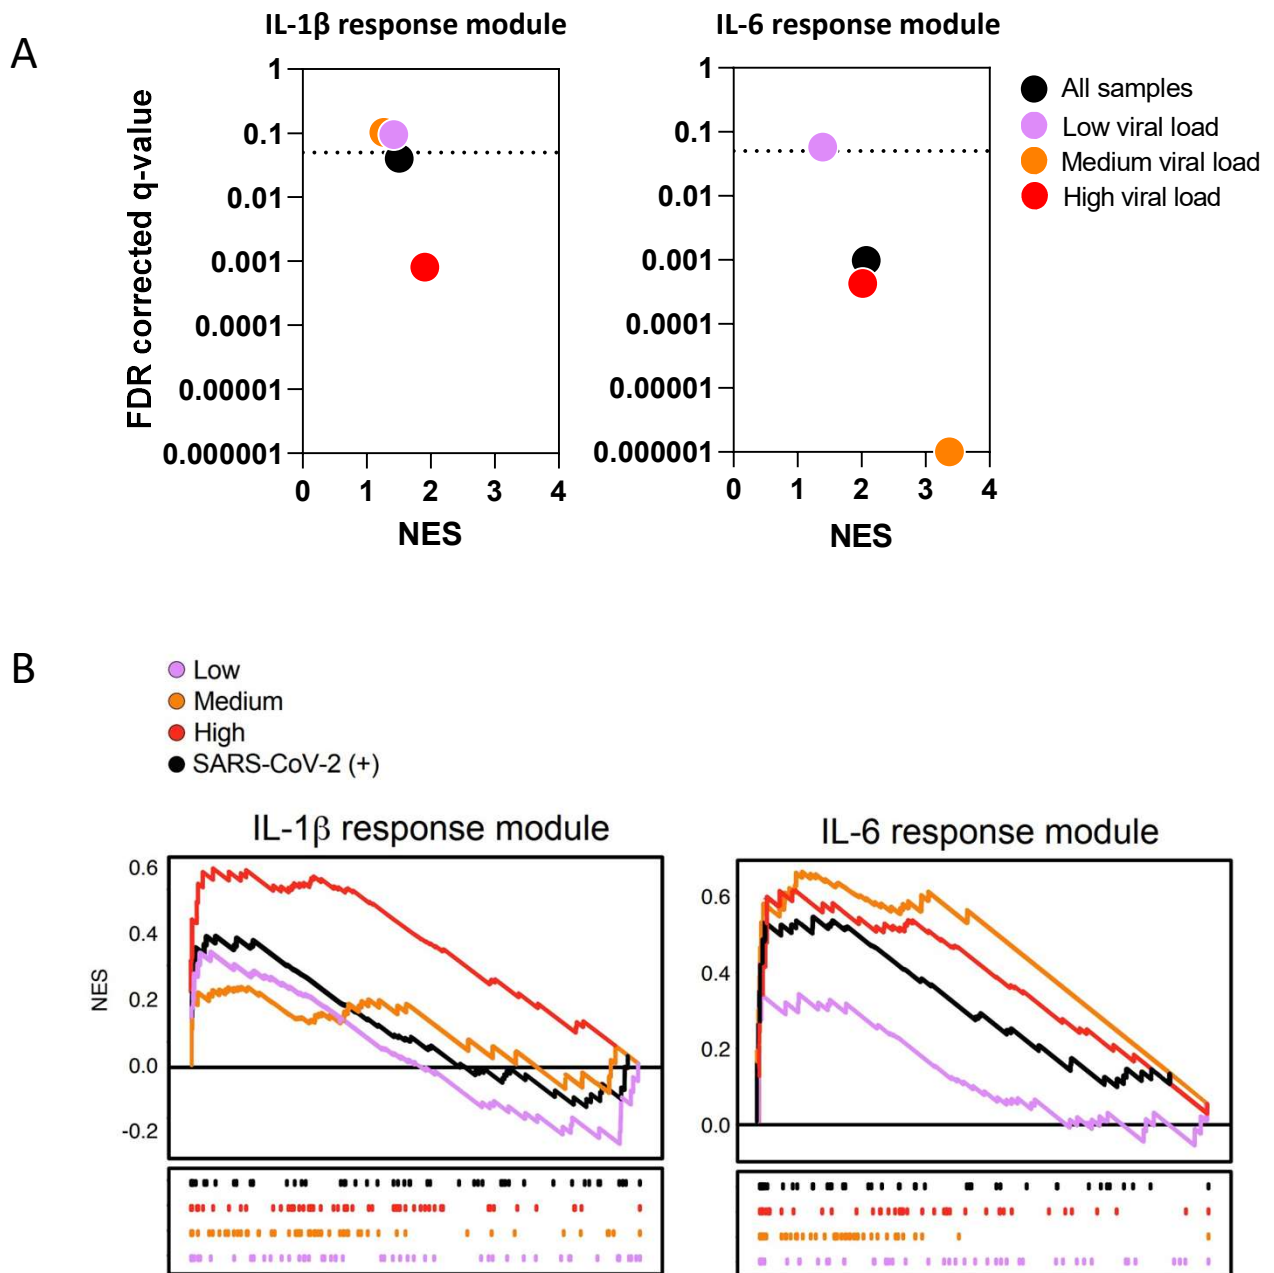

## Figure 5

A

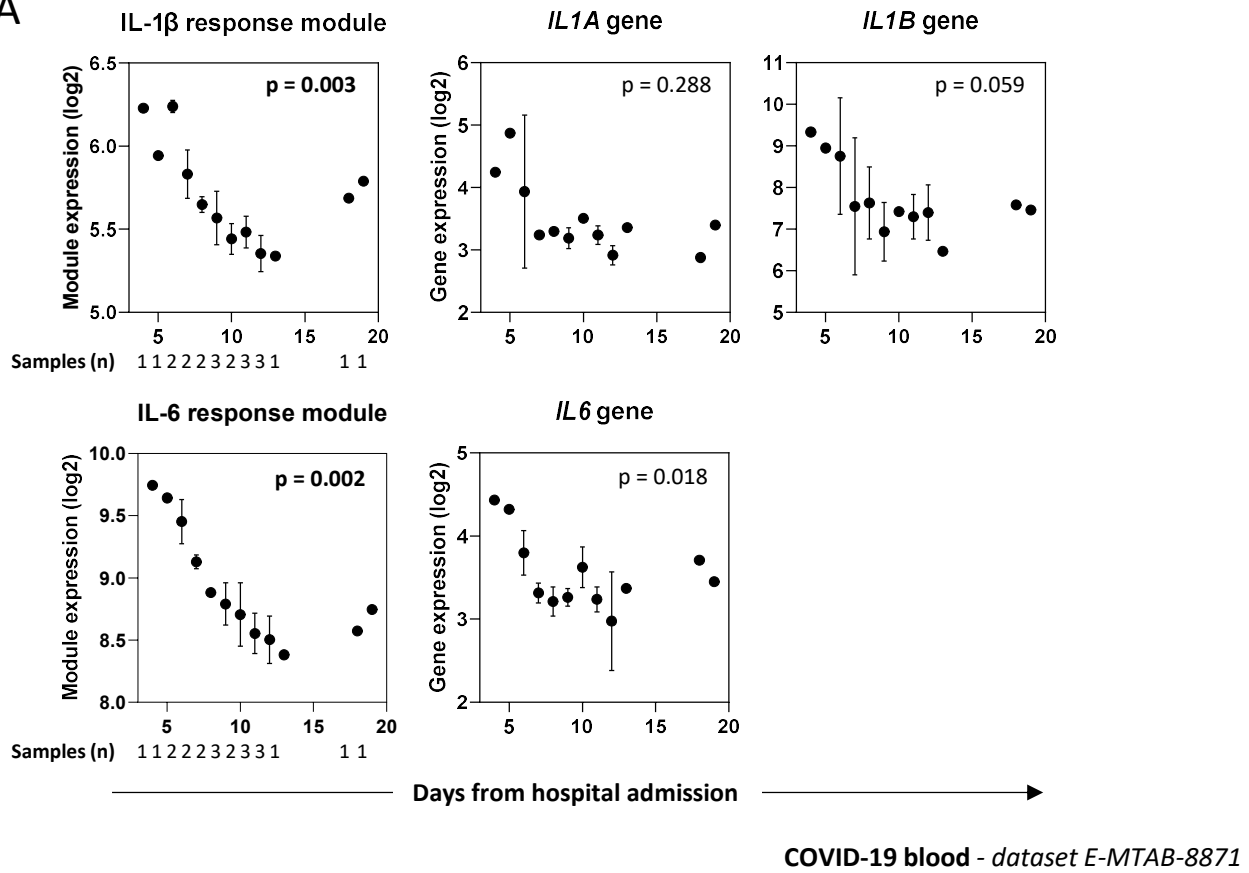

B

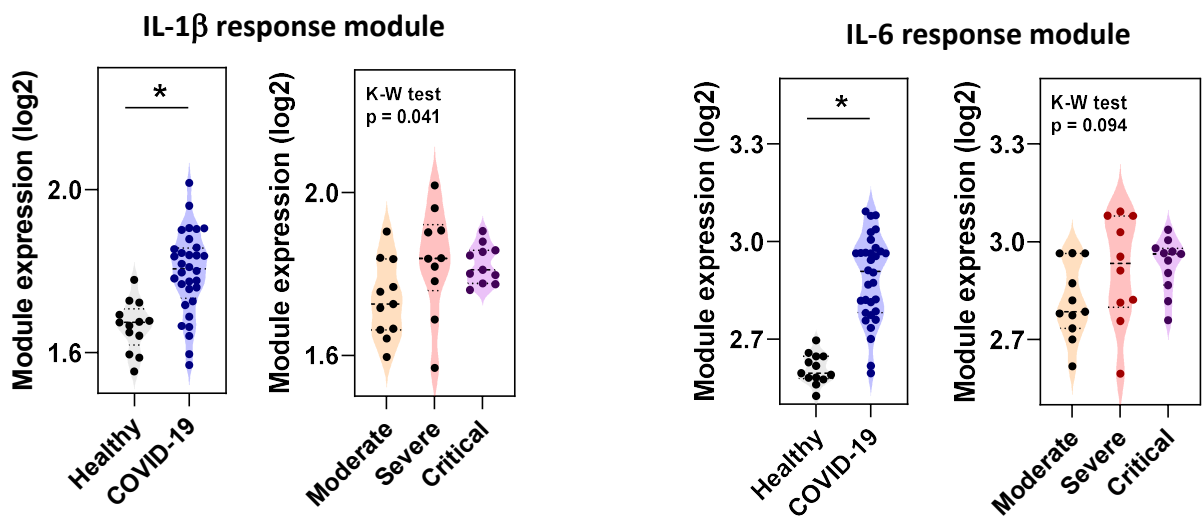

## Figure 6

A

IL-1 $\beta$  response module

IL-6 response module

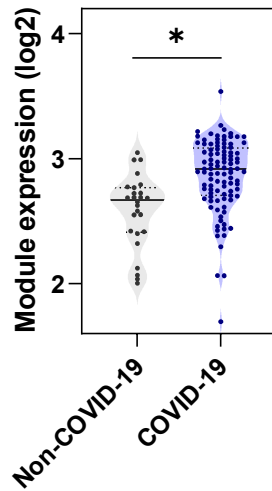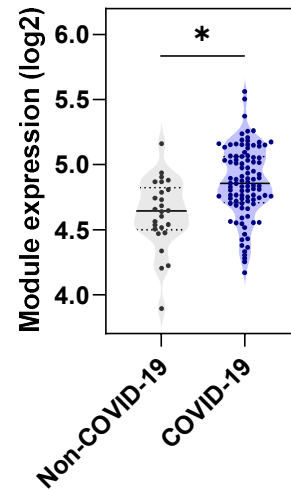

COVID-19 leucocytes - dataset GSE157103

B

T cells

IL-1 $\beta$  module

IL-6 module

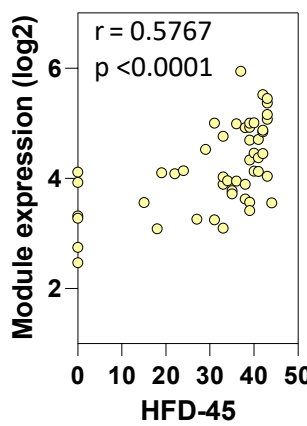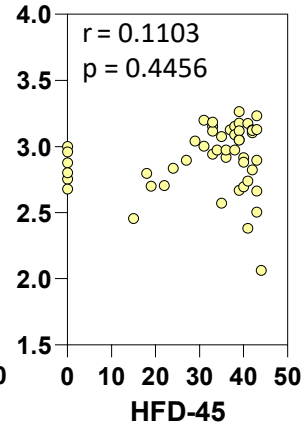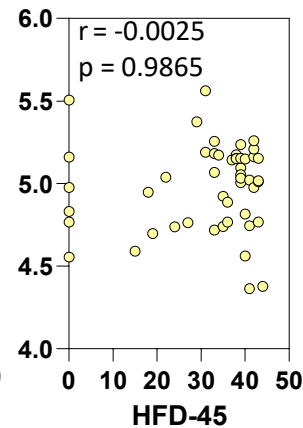

COVID-19 leucocytes - dataset GSE157103



## Figure S1

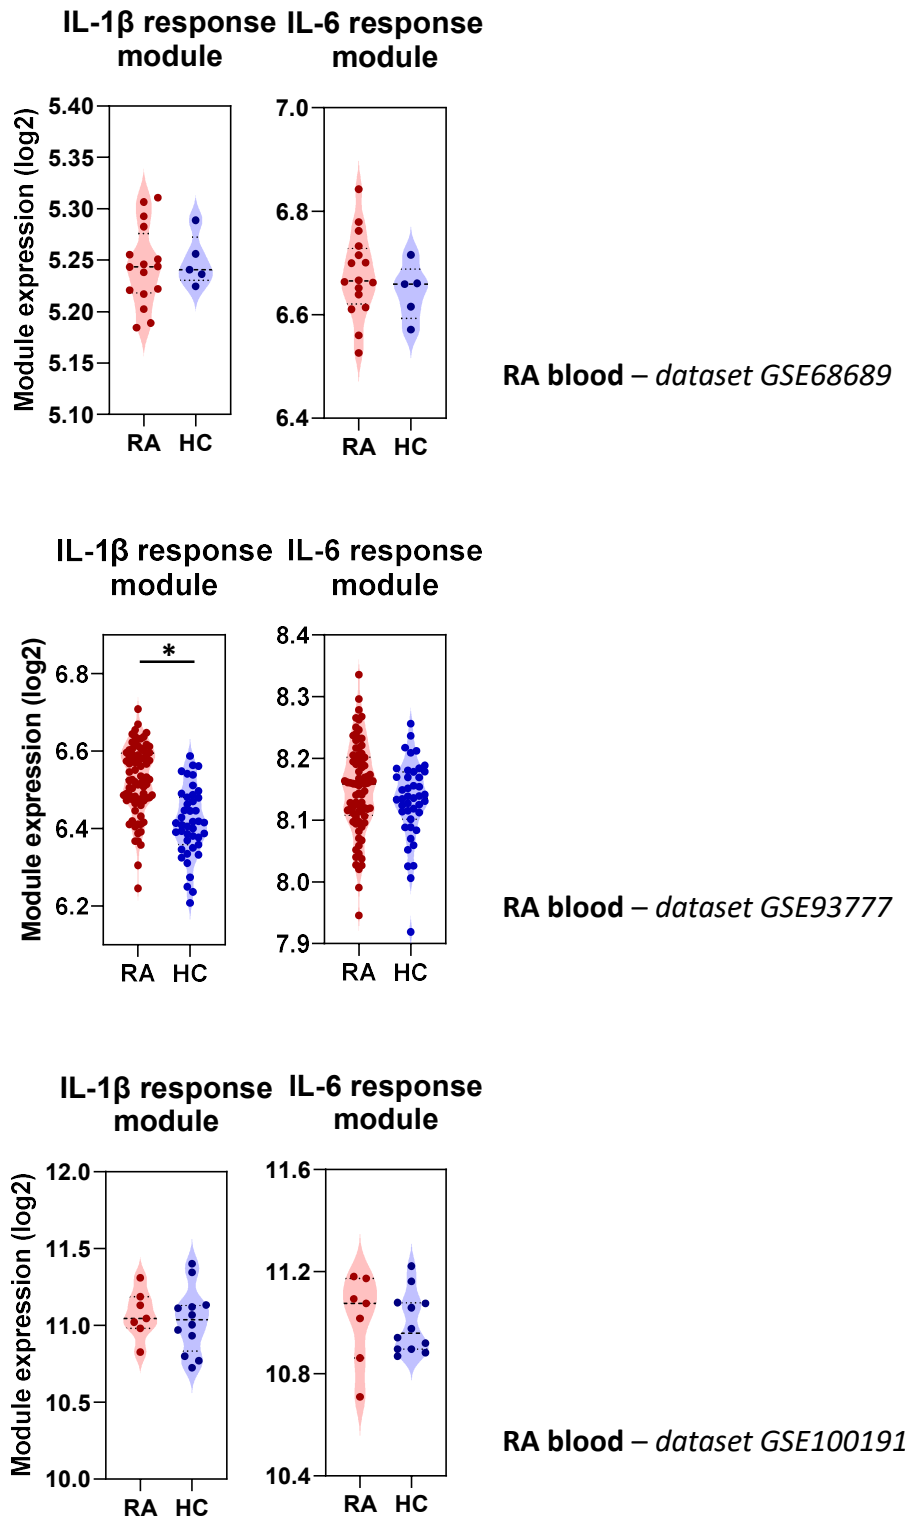

## Figure S2

A

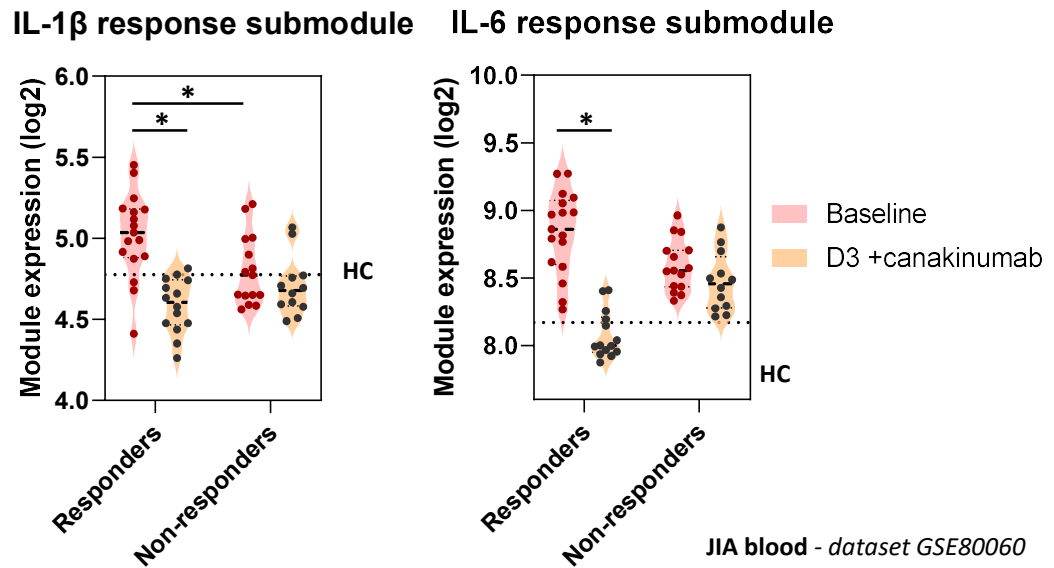

B

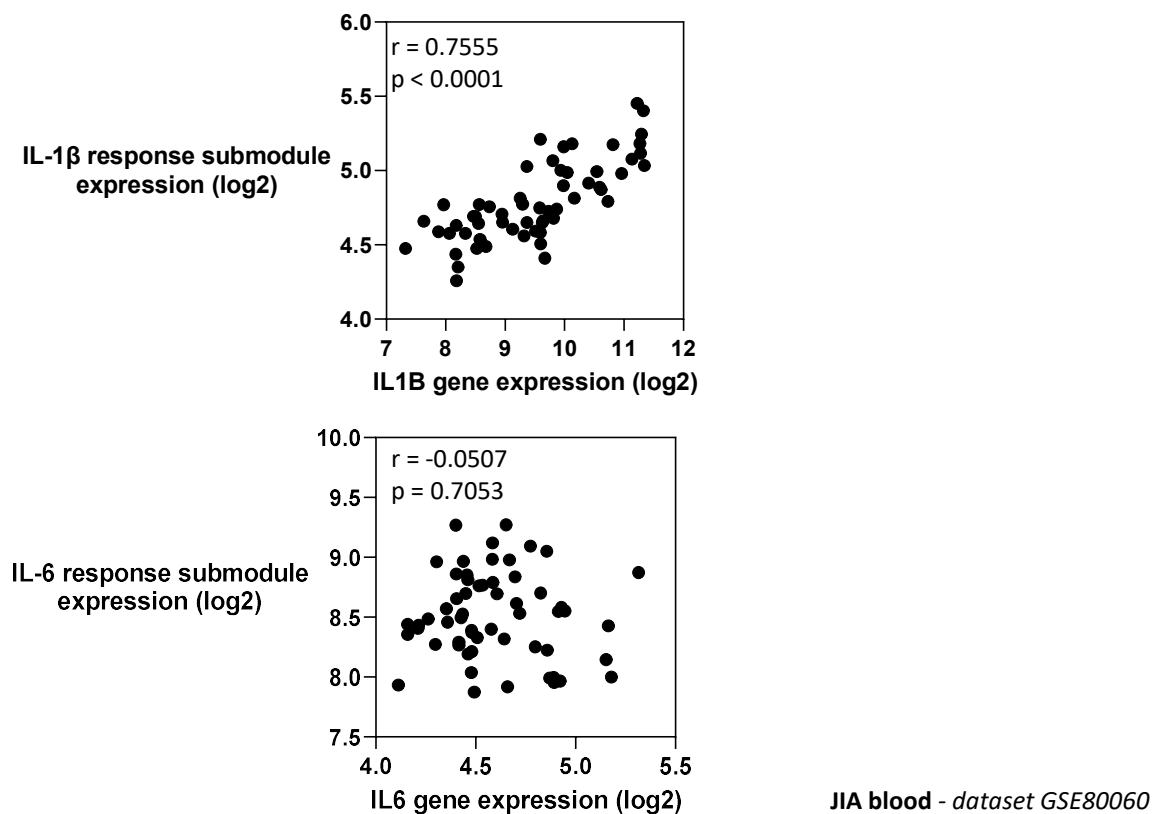

**Figure S3**

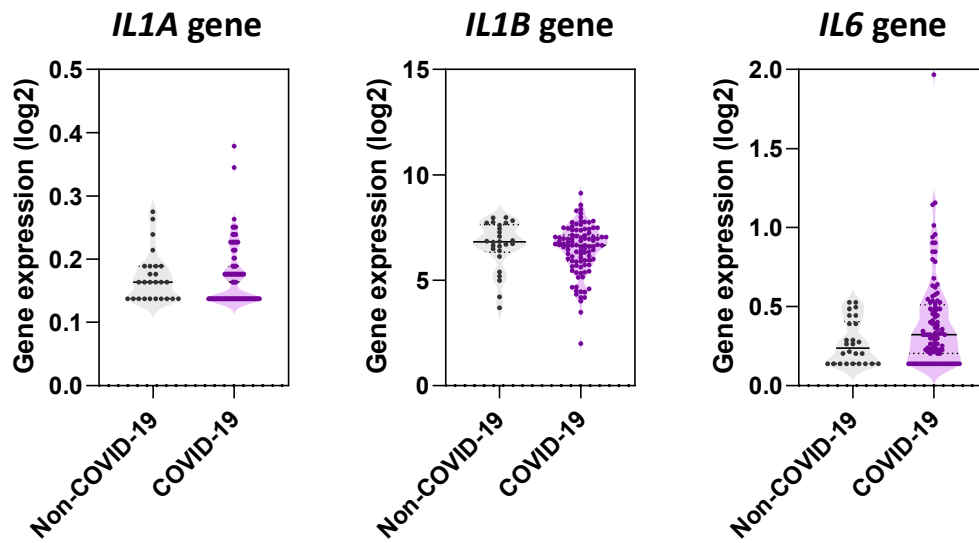

COVID-19 leucocytes - dataset GSE157103

*IL-1 and IL-6 response modules in COVID-19*

Supplemental tables

**Table S1.** Transcriptional datasets used in this manuscript

| Title of dataset                                                                                                                                                   | Doi:                                                                                                | Accession number                                                                          | Repository         |
|--------------------------------------------------------------------------------------------------------------------------------------------------------------------|-----------------------------------------------------------------------------------------------------|-------------------------------------------------------------------------------------------|--------------------|
| Identification of IL-1 and IL-6-responsive genes in human monocyte-derived macrophages                                                                             | 10.1016/j.bbagr.2008.04.006                                                                         | GSE8515                                                                                   | NCBI GEO           |
| Transcriptome analysis in peripheral blood mononuclear cells (PBMC) from HOIL-1-deficient patients upon TNF- $\alpha$ or IL-1 $\beta$ stimulation                  | 10.1038/ni.2457                                                                                     | GSE40838                                                                                  | NCBI GEO           |
| Response of HK-2 cells to stimulation with IL6 and TNF-alpha                                                                                                       | 10.1371/journal.pgen.1005734                                                                        | GSE68940                                                                                  | NCBI GEO           |
| Comparative gene expression in response to various inflammatory stimuli in vitro: infection-mediated versus systemic inflammation                                  | 10.1111/febs.15362                                                                                  | GSE126525                                                                                 | NCBI GEO           |
| Gene expression data of whole blood of systemic juvenile idiopathic arthritis (SJIA) patients treated with canakinumab or placebo and age matched healthy controls | 10.1186/s13075-016-1212-x                                                                           | GSE80060                                                                                  | NCBI GEO           |
| Gene expression from the whole blood of rheumatoid arthritis patients and normal controls.                                                                         | <a href="https://doi.org/10.1016/j.cyto.2019.154960">https://doi.org/10.1016/j.cyto.2019.154960</a> | GSE68689                                                                                  | NCBI GEO           |
| Multi-omics monitoring of drug response in rheumatoid arthritis.                                                                                                   | 10.1038/s41467-018-05044-4                                                                          | GSE93777                                                                                  | NCBI GEO           |
| Transcriptional Signature Associated with Early Rheumatoid Arthritis and Healthy Individuals at high risk to develop the disease.                                  | 10.1371/journal.pone.0194205                                                                        | GSE100191                                                                                 | NCBI GEO           |
| Synovial biopsies of rheumatoid arthritis and healthy controls                                                                                                     | 10.1089/hum.2015.127                                                                                | GSE77298                                                                                  | NCBI GEO           |
| Transcriptomic analysis of immune response in healthy controls and COVID-19 cases using the NanoString Human Immunology Panel                                      | 10.1016/j.chom.2020.03.021                                                                          | E-MTAB-8871                                                                               | ArrayExpress       |
| Large-Scale Multi-omic Analysis of COVID-19 Severity                                                                                                               | 10.1016/j.cels.2020.10.003                                                                          | GSE157103                                                                                 | NCBI GEO           |
| Immune complement and coagulation dysfunction in adverse outcomes of SARS-CoV-2 infection                                                                          | 10.1038/s41591-020-1021-2                                                                           | <a href="https://covidgenes.weill.cornell.edu/">https://covidgenes.weill.cornell.edu/</a> | Cornell University |
| Impaired type I interferon activity and inflammatory responses in severe COVID-19 patients                                                                         | 10.1126/science.abc6027                                                                             | Raw data available from corresponding author                                              |                    |

*IL-1 and IL-6 response modules in COVID-19*

**Table S2.** Cytokine response transcriptional modules and constituent genes

| <b>Module name</b>             | <b>Number of genes</b> | <b>Gene names</b>                                                                                                                                                                                                                                                                                                                                                                                                                                  |
|--------------------------------|------------------------|----------------------------------------------------------------------------------------------------------------------------------------------------------------------------------------------------------------------------------------------------------------------------------------------------------------------------------------------------------------------------------------------------------------------------------------------------|
| <b>IL-1 response</b>           | 57                     | <i>ADORA2A, C15ORF48, C20ORF127, C2CD4B, C7ORF63, CCL20, CCL8, CHMP1B, CSF2, CSF3, CXCL1, CXCL2, CXCL5, CXCL6, DNAJB9, EGLN1, FGF2, FOXO3, GLIS3, GNA15, HAS3, HIATL1, IER3, IL11, IL6, ITPRI3, JARID2, KCNG1, LOC100134000, LRIG1, MAP3K8, MFSD2, MGC87042, MSL3, MT1G, MT1X, MTE, MTHFD2L, NAB1, NAMPT, NFKBIZ, NR4A2, OSGIN2, PFKFB3, PIM2, RCAN1, RNF145, SERPINB4, SGK1, SLC43A3, STEAP1, STEAP2, TFAP2C, TGIF1, TWIST2, ZC3H12A, ZC3H12C</i> |
| <b>IL-1 response submodule</b> | 7                      | <i>CCL20, CCL8, CSF2, CXCL1, CXCL2, IL6, NFKBIZ</i>                                                                                                                                                                                                                                                                                                                                                                                                |
| <b>IL-6 response</b>           | 41                     | <i>AAMP, AKIP1, ANKRD10, ARPC2, CCR1, CD14, CSDE1, CTDSP2, CTNNA1, CXADR, DOK1, GADD45B, HAMP, IDH3B, IFI16, IL16, KAT5, LDLRAP1, MAP4, MR1, MSRB2, NCF4, NDUFB8, NPC1, PGD, PI4K2A, PPARD, PSMD4, RAP1GAP, RHOC, RIN2, RNASE1, RREB1, SASH1, SDS, SP110, STIP1, TSC22D3, UBE2M, UFL1, YBX3</i>                                                                                                                                                    |
| <b>IL-6 response submodule</b> | 7                      | <i>CCR1, CD14, HAMP, IFI16, IL16, MR1, NCF4</i>                                                                                                                                                                                                                                                                                                                                                                                                    |
